# Supplementary material for: Response of Phyllosphere and Rhizosphere Microbial Communities to Salt Stress of Tamarix chinensis
Source: MDPI journal article supplement (doi:10.3390/plants13081091), 2024-04-13
Supplement: s1 [file s1]

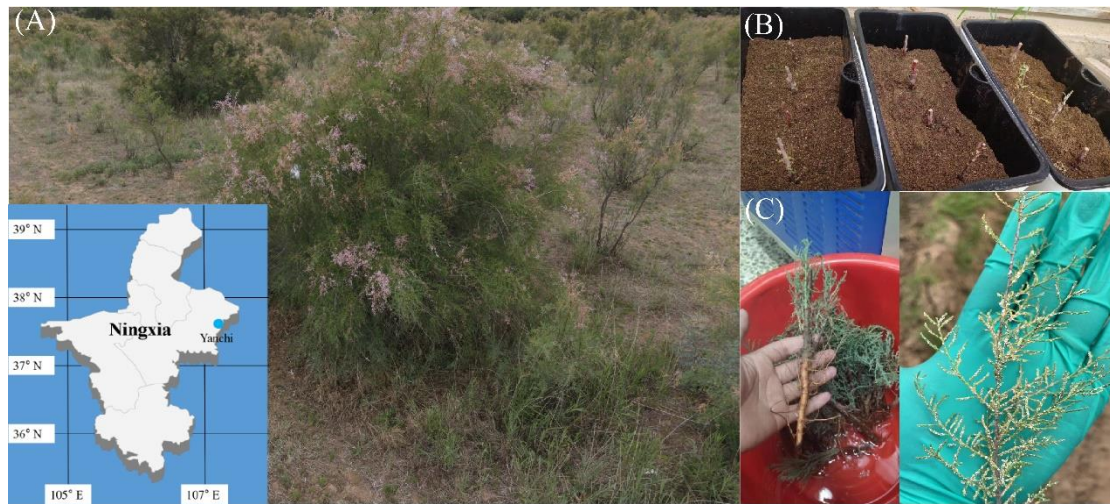

**Figure S1.** Field growth (A) and salt treatment (B and C) of *T. chinensis*.

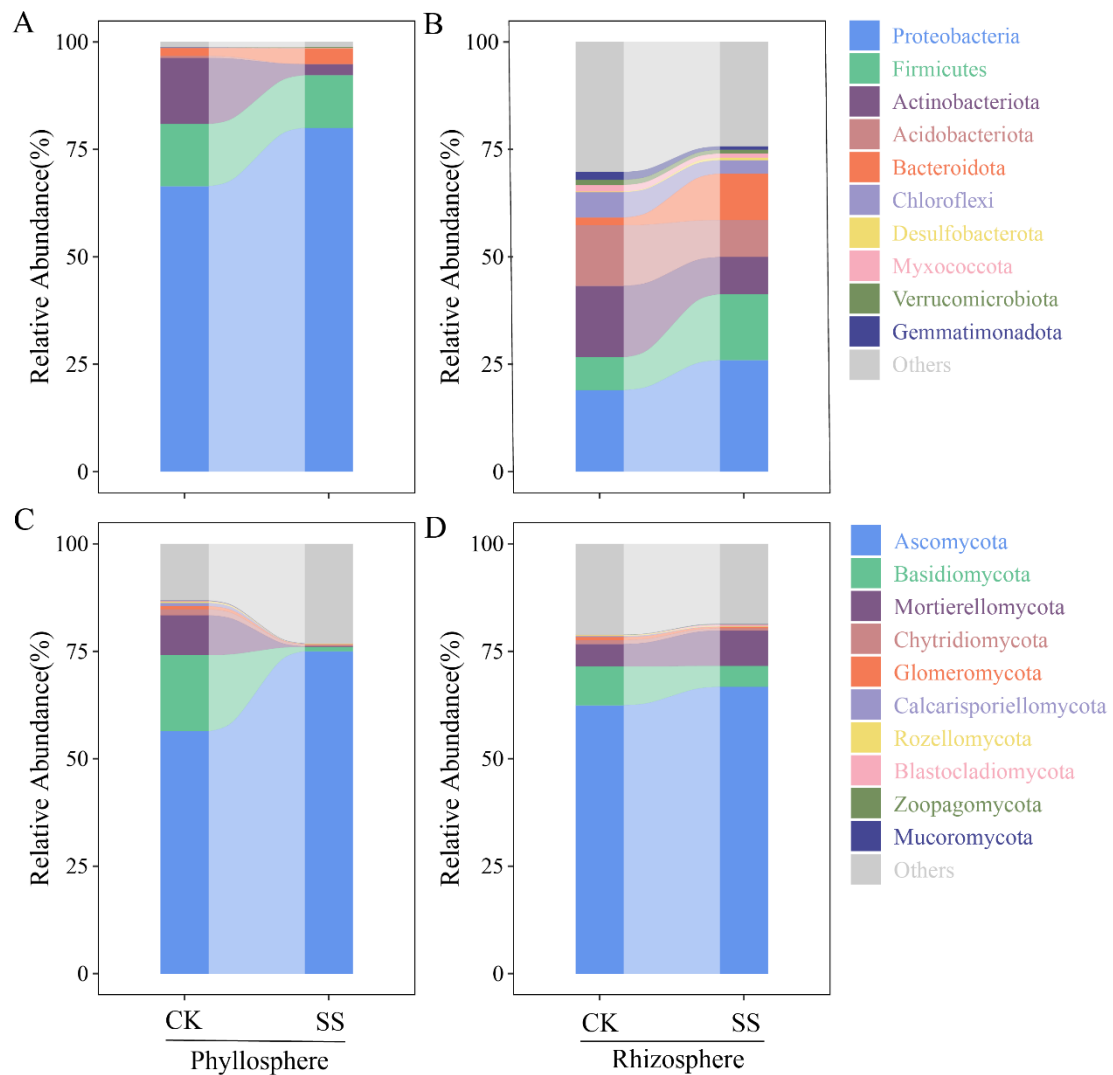

**Figure S2.** Relative abundance (top 10) of phyllosphere and rhizosphere bacterial (A and B) and fungal (C and D) communities at phylum level of *T. chinensis* under salt stress.
