# Supplementary material for: Response of Phyllosphere and Rhizosphere Microbial Communities to Salt Stress of Tamarix chinensis
Source: MDPI journal article supplement (doi:10.3390/plants13081091), 2024-04-13
Supplement: s1 [file s1]

**Table S1.** Relative abundance of phyllosphere and rhizosphere bacteria phylum in *T. chinensis* under salt stress

| Functional groups | Ph. CK          | Ph. SS          | Rh. CK         | Rh. SS         |
|-------------------|-----------------|-----------------|----------------|----------------|
| Proteobacteria    | 0.66±0.06a      | 0.80±0.09a      | 0.19±0.01b     | 0.26±0.02b     |
| Firmicutes        | 0.14±0.05a      | 0.12±0.07a      | 0.08±0.02a     | 0.015±0.04a    |
| Actinobacteriota  | 0.15±0.02a      | 0.03±0.01c      | 0.17±0.01a     | 0.09±0.01b     |
| Acidobacteriota   | 0.0047±0.002c   | 0.0002±0.00008c | 0.1412±0.0136a | 0.0859±0.0148b |
| Bacteroidota      | 0.02±0.004b     | 0.04±0.02b      | 0.02±0.001b    | 0.11±0.03a     |
| Chloroflexi       | 0.0003±0.00008c | 0.0004±0.0001c  | 0.0590±0.0003a | 0.0313±0.0032b |
| Desulfobacterota  | 0.0004±0.0002a  | 0.0003±0.00003a | 0.0017±0.0004a | 0.0057±0.0041a |
| Myxococcota       | 0.0004±0.0002c  | 0.0010±0.0007c  | 0.0152±0.0005a | 0.0097±0.0017b |
| Verrucomicrobiota | 0.0003±0.00009b | 0.0013±0.0002a  | 0.0119±0.0016b | 0.0087±0.0033a |
| Gemmatimonadota   | 0.0003±0.0001c  | 0.0001±0.00003c | 0.0184±0.0009a | 0.0080±0.0016b |

Note: Ph: phyllosphere; Rh: rhizosphere. Different lowercase letters indicate differences between groups.

**Table S2.** Relative abundance of phyllosphere and rhizosphere fungi phylum in *T. chinensis* under salt stress

| Functional groups | Ph. CK       | Ph. SS        | Rh. CK       | Rh. SS        |
|-------------------|--------------|---------------|--------------|---------------|
| Ascomycota        | 0.56±0.08b   | 0.75±0.04a    | 0.62±0.06ab  | 0.67±0.04ab   |
| Basidiomycota     | 0.18±0.09a   | 0.01±0.001b   | 0.09±0.02ab  | 0.05±0.005ab  |
| Mortierellomycota | 0.093±0.021a | 0.001±0.0003c | 0.052±0.004b | 0.082±0.013ab |
| Chytridiomycota   | 0.014±0.007a | 0.005±0.002a  | 0.009±0.004a | 0.005±0.002a  |

|                        |                 |                  |                  |                |
|------------------------|-----------------|------------------|------------------|----------------|
| Glomeromycota          | 0.007±0.003a    | 0.0006±0.0001a   | 0.007±0.002a     | 0.003±0.001a   |
| Calcarisporiellomycota | 0.0076±0.0071a  | 0                | 0.0025±0.0019a   | 0.0005±0.0003a |
| Rozellomycota          | 0.0029±0.0014a  | 0.0007±0.0001a   | 0.0019±0.0006a   | 0.0014±0.0003a |
| Blastocladiomycota     | 0.0009±0.0003ab | 0.00004±0.00002c | 0.0001±0.00007b  | 0.0032±0.0017a |
| Zoopagomycota          | 0.0006±0.0004a  | 0.00007±0.00004a | 0.008±0.004a     | 0.0013±0.0008a |
| Mucoromycota           | 0.0011±0.0004a  | 0.0008±0.0004a   | 0.00007±0.00004a | 0.0007±0.0004a |

Note: Ph: phyllosphere; Rh: rhizosphere. Different lowercase letters indicate differences between groups.

**Table S3.** Relative abundance of energy source functional groups of phyllosphere and rhizosphere bacteria in *T. chinensis* under salt stress

| Functional groups         | Ph. CK             | Ph. SS             | Rh. CK             | Rh. SS             |
|---------------------------|--------------------|--------------------|--------------------|--------------------|
| chemoheterotrophy         | 0.11±0.01b         | 0.20±0.004a        | 0.14±0.006b        | 0.17±0.01a         |
| aerobic chemoheterotrophy | 0.09±0.01b         | 0.17±0.02a         | 0.09±0.008b        | 0.08±0.009b        |
| photoautotrophy           | 0.000062±0.000032a | 0.000934±0.000887a | 0.001276±0.000339a | 0.001994±0.001804a |
| phototrophy               | 0.0001±0.00005a    | 0.0018±0.0008a     | 0.0014±0.0003a     | 0.0022±0.001a      |
| photoheterotrophy         | 0.000047±0.000027b | 0.000854±0.000235a | 0.000134±0.000038b | 0.000229±0.000149b |
| oxygenic photoautotrophy  | 0.000062±0.000032a | 0.000934±0.000887a | 0.001276±0.000339a | 0.001982±0.000179a |

Note: Ph: phyllosphere; Rh: rhizosphere. Different lowercase letters indicate differences between groups.

**Table S4.** Relative abundance of carbon cycle functional groups of phyllosphere and rhizosphere bacteria in *T. chinensis* under salt stress

| Functional groups                             | Ph. CK             | Ph. SS              | Rh. CK               | Rh. SS             |
|-----------------------------------------------|--------------------|---------------------|----------------------|--------------------|
| fermentation                                  | 0.03±0.005b        | 0.03±0.02b          | 0.04±0.007b          | 0.09±0.01a         |
| xylanolysis                                   | 0.0003±0.0002b     | 0.0021±0.0018ab     | 0.0009±0.0005b       | 0.0062±0.002b      |
| methyлотrophy                                 | 0.0069±0.0019a     | 0.0004±0.00005b     | 0.0007±0.00006b      | 0.0005±0.0001b     |
| chitinolysis                                  | 0.0012±0.0008ab    | 0.00003±0.000007b   | 0.0007±0.000008ab    | 0.0027±0.0012a     |
| cellulolysis                                  | 0.0011±0.0005ab    | 0.0002±0.0001b      | 0.0016±0.0006a       | 0.0011±0.0002ab    |
| ligninolysis                                  | 0.000044±0.000009b | 0                   | 0.000081±0.000011a   | 0.000068±0.000023a |
| methanol oxidation                            | 0.0069±0.0019a     | 0.0004±0.00005b     | 0.0007±0.00006b      | 0.0004±0.00008b    |
| methanotrophy                                 | 0                  | 0.000002±0.000001a  | 0.000014±0.000009a   | 0.000092±0.000013a |
| aliphatic non methane hydrocarbon degradation | 0.000057±0.000024b | 0.000001±0.0000008b | 0.0001113±0.000019ab | 0.00025±0.000104a  |
| hydrocarbon degradation                       | 0.0002±0.0005b     | 0.0011±0.0007b      | 0.0002±0.000005b     | 0.0124±0.0064a     |
| aromatic hydrocarbon degradation              | 0.0001±0.00003a    | 0.0011±0.0007a      | 0.0002±0.00004a      | 0.0004±0.0001a     |
| aromatic compound degradation                 | 0.0006±0.0001c     | 0.0013±0.0007bc     | 0.0052±0.0004a       | 0.0021±0.0003b     |

Note: Ph: phyllosphere; Rh: rhizosphere. Different lowercase letters indicate differences between groups.

**Table S5.** Relative abundance of nitrogen cycle functional groups of phyllosphere and rhizosphere bacteria in *T. chinensis* under salt stress

| Functional groups         | Ph. CK             | Ph. SS             | Rh. CK             | Rh. SS             |
|---------------------------|--------------------|--------------------|--------------------|--------------------|
| ureolysis                 | 0.2898±0.05429a    | 0.0002±0.00003b    | 0.0027±0.0007b     | 0.0016±0.0002b     |
| nitrate reduction         | 0.05±0.01b         | 0.15±0.01a         | 0.013±0.001c       | 0.018±0.003c       |
| nitrogen respiration      | 0.037±0.016b       | 0.14±0.016a        | 0.003±0.0005b      | 0.011±0.002b       |
| nitrate respiration       | 0.037±0.0162b      | 0.145±0.0157a      | 0.003±0.0005b      | 0.011±0.002b       |
| nitrite respiration       | 0.0096±0.0019a     | 0.0042±0.0010b     | 0.0008±0.00008c    | 0.0047±0.0011b     |
| aerobic ammonia oxidation | 0                  | 0.000006±0.000003b | 0.009236±0.002173a | 0.005149±0.001933a |
| nitrite denitrification   | 0.0074±0.0021a     | 0.0032±0.0008b     | 0.0006±0.00007b    | 0.0005±0.0001b     |
| nitrate denitrification   | 0.0074±0.0021a     | 0.0032±0.0008b     | 0.0006±0.00007b    | 0.0005±0.0001b     |
| nitrification             | 0                  | 0.000006±0.000003b | 0.009236±0.002173a | 0.005156±0.001931a |
| nitrite ammonification    | 0.0022±0.0008ab    | 0.0011±0.00007b    | 0.0002±0.0008b     | 0.0043±0.0011a     |
| nitrogen fixation         | 0.000206±0.000102c | 0.000076±0.000038c | 0.001826±0.000375a | 0.000942±0.000298b |
| nitrate ammonification    | 0.001619±0.000809a | 0.000015±0.000008b | 0.000052±0.000014b | 0.00062±0.000183ab |

Note: Ph: phyllosphere; Rh: rhizosphere.

**Table S6.** Relative abundance of phosphorus cycle functional groups of phyllosphere and rhizosphere bacteria in *T. chinensis* under salt stress

| Functional groups                  | Ph. CK             | Ph. SS             | Rh. CK             | Rh. SS             |
|------------------------------------|--------------------|--------------------|--------------------|--------------------|
| sulfate respiration                | 0.000155±0.000114b | 0.000051±0.000013b | 0.000542±0.000192b | 0.000927±0.000342a |
| sulfite respiration                | 0                  | 0.000003±0.000002a | 0.000004±0.000004a | 0.000181±0.000144a |
| sulfur respiration                 | 0                  | 0                  | 0                  | 0.0001±0.000008a   |
| respiration of sulfur compounds    | 0.000155±0.000114b | 0.000068±0.000019b | 0.000575±0.000197b | 0.005884±0.002647a |
| thiosulfate respiration            | 0                  | 0.000018±0.000011b | 0.000033±0.000026b | 0.004881±0.002803a |
| dark sulfide oxidation             | 0.000012±0.000006a | 0.000011±0.000004a | 0.000020±0.000011a | 0.000103±0.000012a |
| dark sulfur oxidation              | 0.000006±0.000004a | 0                  | 0                  | 0.000094±0.000087a |
| dark sulfite oxidation             | 0                  | 0                  | 0                  | 0.000095±0.000082a |
| dark oxidation of sulfur compounds | 0.000089±0.000039a | 0.001049±0.00077a  | 0.000104±0.000044a | 0.000324±0.000206a |
| dark thiosulfate oxidation         | 0.000083±0.000037a | 0.001038±0.000772a | 0.000084±0.000039  | 0.000127±0.000101a |

Note: Ph: phyllosphere; Rh: rhizosphere.
